# Supplementary material for: Internet Use Frequency and Patient-Centered Care: Measuring Patient Preferences for Participation Using the Health Information Wants Questionnaire
Source: PubMed Central journal article supplement (PMC3714005; doi:10.2196/jmir.2615), 2013-07-01
Supplement: jmir_v15i7e132_app1.pdf [file jmir_v15i7e132_app1.pdf]

## Health Questionnaire

Please fill out this questionnaire. All of your responses will be treated confidentially. Any published document regarding these responses will not identify individuals. Thank you in advance for your help!

### Part 1

1. Please think about a specific health condition you had in the past or currently have, and **write down the name of this health condition here:** \_\_\_\_\_

1a. Is this a condition you had in the past or currently have? Please circle ONE:

<sup>1</sup>Had in the past

<sup>2</sup>Currently have

1b. How long have you had this condition? \_\_\_\_\_ Year(s) and \_\_\_\_\_ Month(s)

2. How severe do you think this health condition is/was? Please circle ONE:

<sup>1</sup>  
Not severe at all

<sup>2</sup>  
A little severe

<sup>3</sup>  
Moderately severe

<sup>4</sup>  
Very severe

<sup>5</sup>  
Extremely severe

3. How knowledgeable do you think you are about this condition?

<sup>1</sup>  
Not at all  
knowledgeable

<sup>2</sup>  
A little  
knowledgeable

<sup>3</sup>  
Moderately  
knowledgeable

<sup>4</sup>  
Very  
knowledgeable

<sup>5</sup>  
Extremely  
knowledgeable

4. How much information would you like to have about this condition?

<sup>1</sup>  
None

<sup>2</sup>  
A little

<sup>3</sup>  
Some

<sup>4</sup>  
Most

<sup>5</sup>  
All

5. Circle the appropriate number of **each row** to indicate how much information you would like to have about each of the following areas **related to this specific health condition**:

**How much information would you like to have?**

|                                                                                                           |           |               |           |           |          |
|-----------------------------------------------------------------------------------------------------------|-----------|---------------|-----------|-----------|----------|
| 1. Information about the stage of this health condition (e.g., how advanced it is, how far it has spread) | None<br>1 | A little<br>2 | Some<br>3 | Most<br>4 | All<br>5 |
| 2. Information about how severe this health condition is                                                  | None<br>1 | A little<br>2 | Some<br>3 | Most<br>4 | All<br>5 |
| 3. Information explaining why further referral is necessary                                               | None<br>1 | A little<br>2 | Some<br>3 | Most<br>4 | All<br>5 |
| 4. Information about whether this health condition is contagious                                          | None<br>1 | A little<br>2 | Some<br>3 | Most<br>4 | All<br>5 |
| 5. Information explaining how a medication may help to treat this health condition                        | None<br>1 | A little<br>2 | Some<br>3 | Most<br>4 | All<br>5 |
| 6. Information about the specific drug(s) prescribed                                                      | None<br>1 | A little<br>2 | Some<br>3 | Most<br>4 | All<br>5 |
| 7. Information about changing medications                                                                 | None<br>1 | A little<br>2 | Some<br>3 | Most<br>4 | All<br>5 |

Circle the appropriate number of **each row** to indicate how much information you would like to have about each of the following areas **related to this specific health condition**:

## **How much information would you like to have?**

|                                                                                                                                                 |           |               |           |           |          |
|-------------------------------------------------------------------------------------------------------------------------------------------------|-----------|---------------|-----------|-----------|----------|
| 8. Information about the benefits and risks of different laboratory tests                                                                       | None<br>1 | A little<br>2 | Some<br>3 | Most<br>4 | All<br>5 |
| 9. Information about the procedures of laboratory tests                                                                                         | None<br>1 | A little<br>2 | Some<br>3 | Most<br>4 | All<br>5 |
| 10. Information about interpretations of the results of laboratory tests                                                                        | None<br>1 | A little<br>2 | Some<br>3 | Most<br>4 | All<br>5 |
| 11. Information about how this health condition may affect my work                                                                              | None<br>1 | A little<br>2 | Some<br>3 | Most<br>4 | All<br>5 |
| 12. Information about how this health condition may affect my personal life (e.g., sexual activity, smoking, alcohol use, hobbies)              | None<br>1 | A little<br>2 | Some<br>3 | Most<br>4 | All<br>5 |
| 13. Information about how to care for a wound or incision at home                                                                               | None<br>1 | A little<br>2 | Some<br>3 | Most<br>4 | All<br>5 |
| 14. Information about the benefits and risks of using complementary/alternative medicine alone versus in combination with conventional medicine | None<br>1 | A little<br>2 | Some<br>3 | Most<br>4 | All<br>5 |
| 15. Information about <u>when</u> to get complementary/alternative medicine                                                                     | None<br>1 | A little<br>2 | Some<br>3 | Most<br>4 | All<br>5 |
| 16. Information about <u>where</u> to get complementary/alternative medicine                                                                    | None<br>1 | A little<br>2 | Some<br>3 | Most<br>4 | All<br>5 |

Circle the appropriate number of **each row** to indicate how much information you would like to have about each of the following areas **related to this specific health condition**:

| <b>How much <u>information</u> would you like to have?</b>                                            |           |               |           |           |          |
|-------------------------------------------------------------------------------------------------------|-----------|---------------|-----------|-----------|----------|
| 17. Information about support groups where I can talk with other people in similar situations         | None<br>1 | A little<br>2 | Some<br>3 | Most<br>4 | All<br>5 |
| 18. Information about how the treatment may affect feelings about myself                              | None<br>1 | A little<br>2 | Some<br>3 | Most<br>4 | All<br>5 |
| 19. Information about how to involve my family in dealing with feelings about this health condition   | None<br>1 | A little<br>2 | Some<br>3 | Most<br>4 | All<br>5 |
| 20. Information about the credentials, experiences, or reputations of a particular medical facility   | None<br>1 | A little<br>2 | Some<br>3 | Most<br>4 | All<br>5 |
| 21. Information about the credentials, experiences, or reputations of a particular medical specialist | None<br>1 | A little<br>2 | Some<br>3 | Most<br>4 | All<br>5 |

## Part 2

1. Please write down here the name of the specific health condition that you wrote down on the first page: \_\_\_\_\_, and continue thinking about this health condition while filling out the next section.

2. Who do you think should make the decision related to this specific health condition?  
**Circle** one of the following:

The doctor  
alone

Mostly  
the doctor

The doctor and  
myself equally

Mostly  
myself

Myself  
alone

3. Circle the appropriate cell of **each row** to indicate **who you think should make the decision** **in each of the following areas:**

| <b>Who do you think should make the decision?</b>                                                          |                  |                   |                               |               |              |
|------------------------------------------------------------------------------------------------------------|------------------|-------------------|-------------------------------|---------------|--------------|
| 1. Decision regarding what stage of this condition it is (e.g., how advanced it is, how far it has spread) | The doctor alone | Mostly the doctor | The doctor and myself equally | Mostly myself | Myself alone |
| 2. Decision regarding how severe this health condition is                                                  | The doctor alone | Mostly the doctor | The doctor and myself equally | Mostly myself | Myself alone |
| 3. Decision regarding whether further referral is necessary                                                | The doctor alone | Mostly the doctor | The doctor and myself equally | Mostly myself | Myself alone |
| 4. Decision regarding whether this health condition is contagious                                          | The doctor alone | Mostly the doctor | The doctor and myself equally | Mostly myself | Myself alone |
| 5. Decision regarding whether to use a medication                                                          | The doctor alone | Mostly the doctor | The doctor and myself equally | Mostly myself | Myself alone |
| 6. Decision regarding which specific drug(s) to use                                                        | The doctor alone | Mostly the doctor | The doctor and myself equally | Mostly myself | Myself alone |
| 7. Decision regarding whether to change medications                                                        | The doctor alone | Mostly the doctor | The doctor and myself equally | Mostly myself | Myself alone |

Circle the appropriate cell of **each row** to indicate **who you think should make the decision in each of the following areas:**

| <b>Who do you think should make the decision?</b>                                |                  |                   |                               |               |              |
|----------------------------------------------------------------------------------|------------------|-------------------|-------------------------------|---------------|--------------|
| 8. Decision regarding what laboratory test(s) to use                             | The doctor alone | Mostly the doctor | The doctor and myself equally | Mostly myself | Myself alone |
| 9. Decision regarding how to proceed with a given laboratory test                | The doctor alone | Mostly the doctor | The doctor and myself equally | Mostly myself | Myself alone |
| 10. Decision regarding how to interpret the results of a given laboratory test   | The doctor alone | Mostly the doctor | The doctor and myself equally | Mostly myself | Myself alone |
| 11. Decision regarding how to adapt to this health condition at work             | The doctor alone | Mostly the doctor | The doctor and myself equally | Mostly myself | Myself alone |
| 12. Decision regarding how to adapt to this health condition in my personal life | The doctor alone | Mostly the doctor | The doctor and myself equally | Mostly myself | Myself alone |
| 13. Decision regarding how to care for a wound or incision at home               | The doctor alone | Mostly the doctor | The doctor and myself equally | Mostly myself | Myself alone |

Circle the appropriate cell of **each row** to indicate **who you think should make the decision in each of the following areas:**

| <b>Who do you think should make the decision?</b>                                                                       |                  |                   |                               |               |              |
|-------------------------------------------------------------------------------------------------------------------------|------------------|-------------------|-------------------------------|---------------|--------------|
| 14. Decision regarding whether to use complementary/alternative medicine alone or in combination with standard medicine | The doctor alone | Mostly the doctor | The doctor and myself equally | Mostly myself | Myself alone |
| 15. Decision regarding <u>when</u> to get complementary/alternative medicine                                            | The doctor alone | Mostly the doctor | The doctor and myself equally | Mostly myself | Myself alone |
| 16. Decision regarding <u>where</u> to get complementary/alternative medicine                                           | The doctor alone | Mostly the doctor | The doctor and myself equally | Mostly myself | Myself alone |
| 17. Decision regarding whether to join support groups to talk with other people in similar situations                   | The doctor alone | Mostly the doctor | The doctor and myself equally | Mostly myself | Myself alone |
| 18. Decision regarding how to deal with feelings about myself as a result of the treatment                              | The doctor alone | Mostly the doctor | The doctor and myself equally | Mostly myself | Myself alone |
| 19. Decision regarding how to involve my family in dealing with feelings about this health condition                    | The doctor alone | Mostly the doctor | The doctor and myself equally | Mostly myself | Myself alone |
| 20. Decision regarding whether to go to a particular medical facility                                                   | The doctor alone | Mostly the doctor | The doctor and myself equally | Mostly myself | Myself alone |
| 21. Decision regarding whether to see a particular medical specialist                                                   | The doctor alone | Mostly the doctor | The doctor and myself equally | Mostly myself | Myself alone |
